# Supplementary material
Source: MDPI journal article supplement (https://www.mdpi.com/2073-4441/10/11/1606)
Supplement: s1 [file s1]

*Supplementary materials for manuscript entitled:*

# **Effects of Dredging Season on Sediment Properties and Nutrient Fluxes across the Sediment–Water Interface in Meiliang Bay of Lake Taihu, China**

**Ji-cheng Zhong <sup>1,\*</sup> Ju-hua Yu <sup>1</sup>, Xiao-lan Zheng <sup>1</sup>, Shuai-long Wen <sup>1</sup>, De-hong Liu <sup>2</sup> and Cheng-xin Fan <sup>1</sup>**

<sup>1</sup> State Key Laboratory of Lake Science and Environment, Nanjing Institute of Geography and Limnology, Chinese Academy of Sciences, Nanjing 210008, China; yujuhua0000@163.com (J.-h.Y.); zxl7182@163.com (X.-l.Z.); wensl313@sina.com (S.-l.W.); cxfan@niglas.ac.cn (C.-x.F)

<sup>2</sup> School of Geography Science, Nanjing Normal University, Nanjing 210023, China; l66dehong@126.com

\* Correspondence: jczhong@niglas.ac.cn; Tel.: +86-025-8688-2212; Fax: +86-025-5771-4759

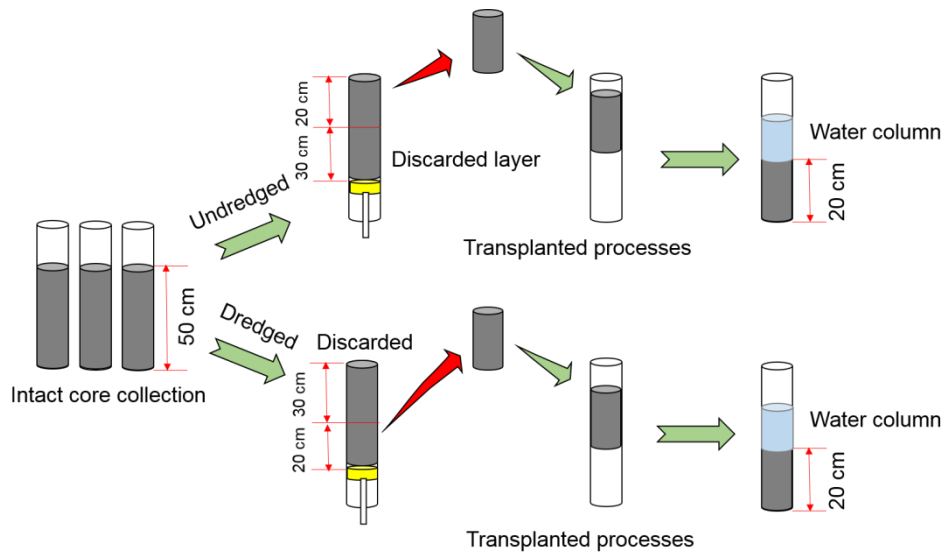

**Figure S1.** Schematic diagram of fabrication process for dredged and undredged sediment cores in microcosm experiment.

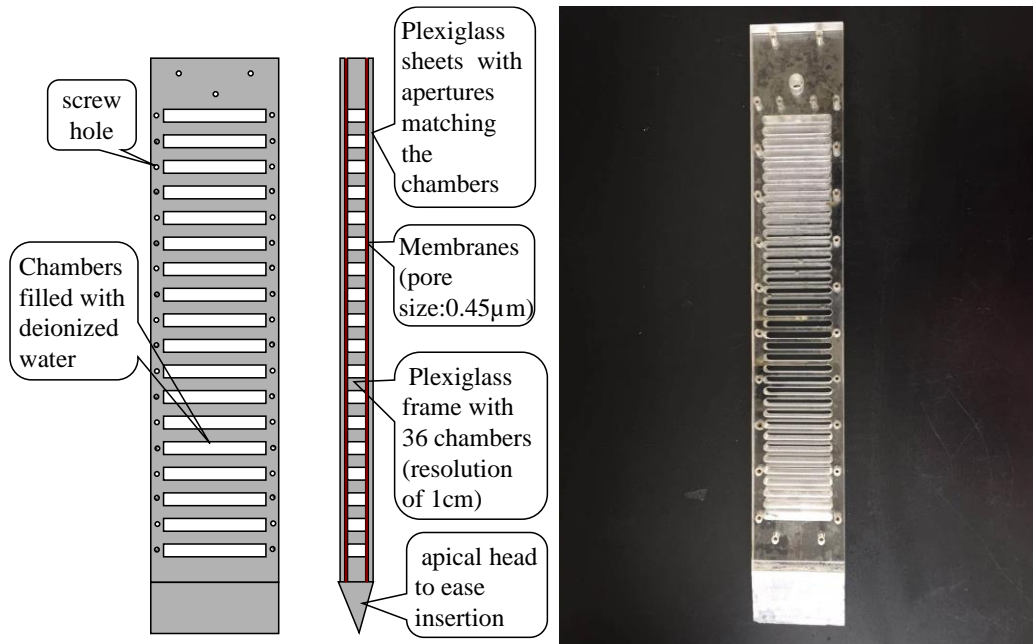

**Figure S2.** Schematic and physical photograph of Peeper.
